# Supplementary material for: Revisiting Microbial Diversity in Hypersaline Microbial Mats from Guerrero Negro for a Better Understanding of Methanogenic Archaeal Communities
Source: MDPI journal article supplement (doi:10.3390/microorganisms11030812), 2023-03-22
Supplement: s1 [file s1]

## Supplementary Materials

## Revisiting microbial diversity in hypersaline microbial mats from Guerrero Negro for a better understanding of methanogenic archaeal communities.

García-Maldonado José Q., Latisnere-Barragán Hever, Escobar-Zepeda Alejandra, Cadena Santiago, Ramírez-Arenas Patricia J., Vázquez-Juárez Ricardo, Rojas-Contreras Maurilia and López-Cortés Alejandro.

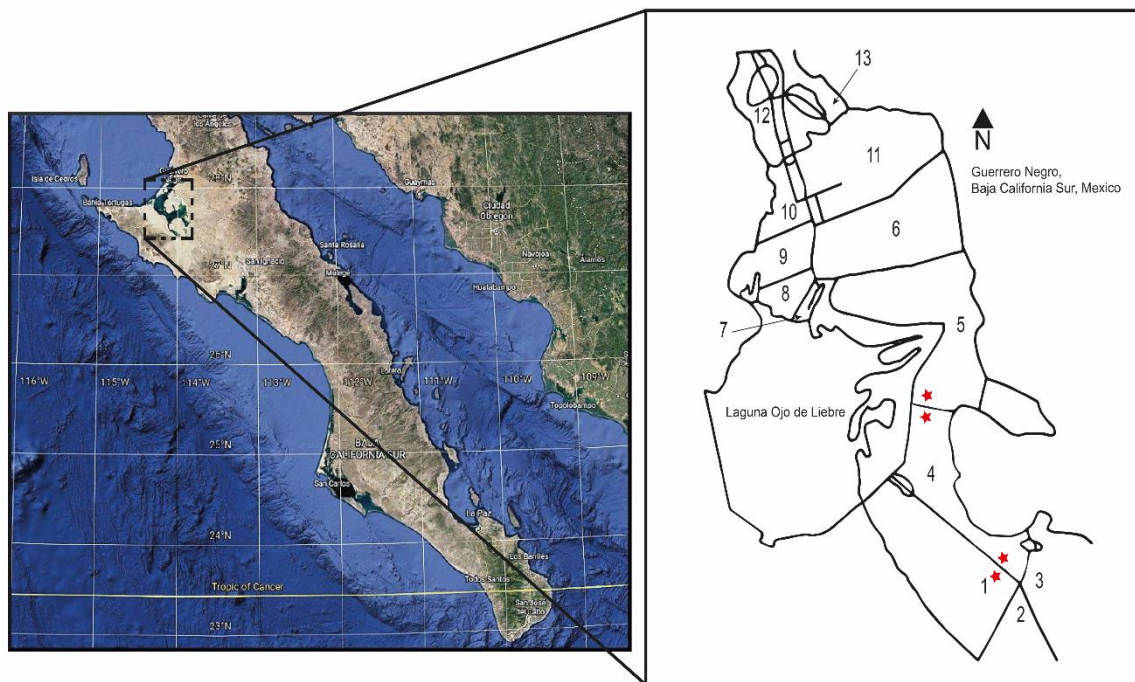

**Figure S1.** Map of the studied sites. At left, satellite map of Baja California Peninsula, photo property of Google Earth. At right, schematic representation of brine concentrators ponds (numbers) of Exportadora de Sal S.A. Sites where the microbial mats samples were collected are indicated with red stars.

**Table S1.** Sequences of primers used in the study.

| Primer name                       | Targeted gene     | 5'-3' sequence                                  | Tm °C | Expected amplicon size | Reference          |
|-----------------------------------|-------------------|-------------------------------------------------|-------|------------------------|--------------------|
| 515F-Y                            | <i>V4-V6 rRNA</i> | GTGYCAGCMGCCGCGGTAA                             | 52    | 411                    | Parada et al. 2008 |
| 926R                              |                   | CCGYCAATTYMTTTRAGTTT                            |       |                        |                    |
| Illumina adapter + Primer 515-F-Y |                   | TCGTCGGCAGCGTCAGATGTGTATAAGAGACAG + 515-F-Y     | 52    | 477                    | This study         |
| Illumina adapter + Primer 926R    |                   | GTCTCGTGGGCTCGGAGATGTGTATAAGAGACA + 926R        |       |                        |                    |
| mlas-mod-F                        | <i>mcrA</i>       | GGYGGTGTMGGDTTCACMCARTA                         | 60-55 | 469bp                  | Angel et al. 2012  |
| mcrA-rev-R                        |                   | CGTTCATBGCCTAGTTVGGRTAGT                        |       |                        |                    |
| mlas-mod-F + Illumina             |                   | TCGTCGGCAGCGTCAGATGTGTATAAGAGACAG + mlas-mod-F  | 60-55 | 536bp                  | This study         |
| mcrA-rev-R + Illumina             |                   | GTCTCGTGGGCTCGGAGATGTGTATAAGAGACAG + mcrA-rev-R |       |                        |                    |

**Table S2.** Summary of 16S rRNA gene sequencing data from sampling sites after demultiplexing, denoising, and quality control of amplicons.

| Sample | Raw data | Quality filtered | Denoised | Non-chimeric | Archaeal sequences | Bacterial sequences |
|--------|----------|------------------|----------|--------------|--------------------|---------------------|
| A1a    | 16687    | 15998            | 15998    | 13868        | 557                | 13311               |
| A1b    | 19417    | 18663            | 18663    | 15564        | 542                | 15022               |
| A1c    | 19548    | 18728            | 18728    | 15692        | 208                | 15484               |
| A4N1a  | 16841    | 16063            | 16063    | 14154        | 240                | 13914               |
| A4N1b  | 16966    | 16127            | 16127    | 14407        | 224                | 14183               |
| A4N1c  | 16461    | 15669            | 15669    | 14268        | 192                | 14076               |
| A4N5a  | 14146    | 13649            | 13649    | 10765        | 40                 | 10725               |
| A4N5b  | 16052    | 15568            | 15568    | 12033        | 6                  | 12027               |
| A4N5c  | 16392    | 15906            | 15906    | 12784        | 22                 | 12762               |
| A5a    | 18164    | 17210            | 17210    | 14352        | 560                | 13792               |
| A5b    | 16939    | 16136            | 16136    | 12384        | 303                | 12081               |
| A5c    | 16011    | 15224            | 15224    | 11896        | 508                | 11388               |

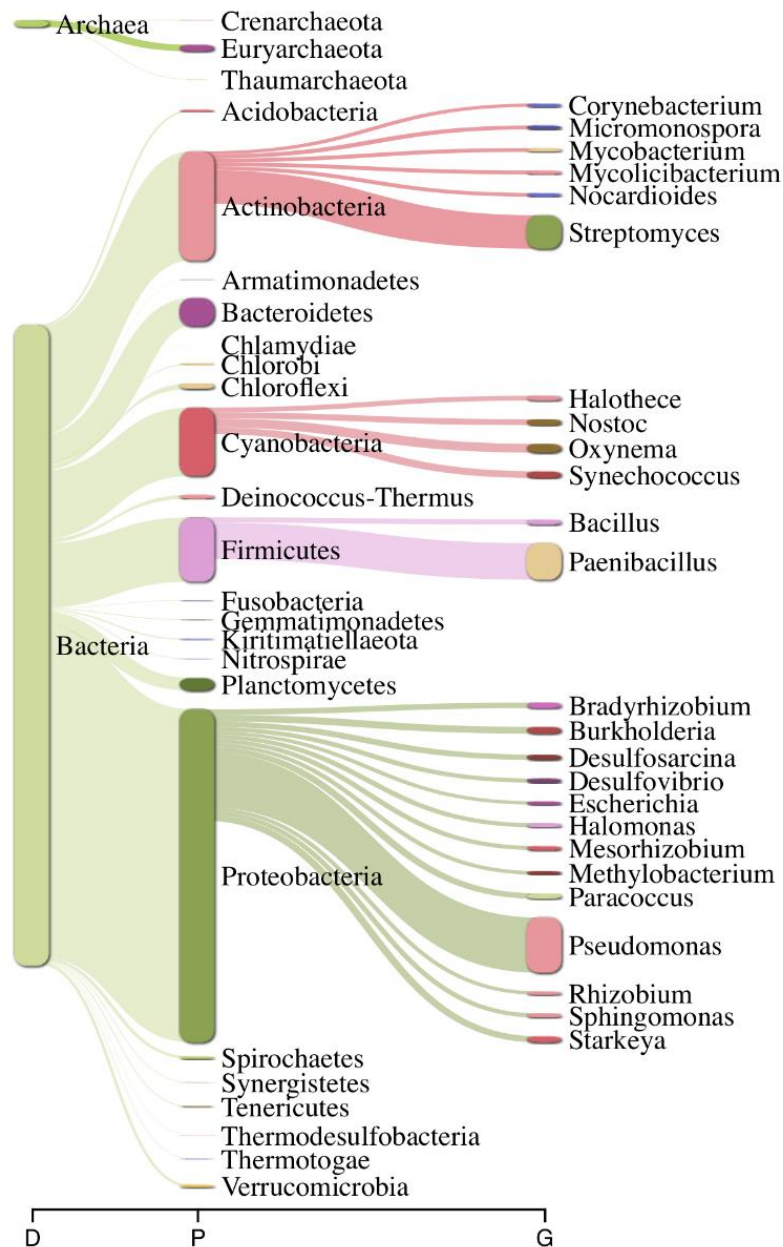

**Figure S2.** Sankey diagram showing the relative abundances of taxonomic groups at domain (D), phylum (P) and genus (G) ranks for whole metagenome shotgun reads of sample A5. Abundances were calculated using Kraken2 v. 2.1.2 and adjusted with Bracken v. 2.6.2 versus the k2\_pluspf\_8gb database downloaded on 2021-05-17. The diagram was visualised using Pavian v. 1.0 (10.1093/bioinformatics/btz715).

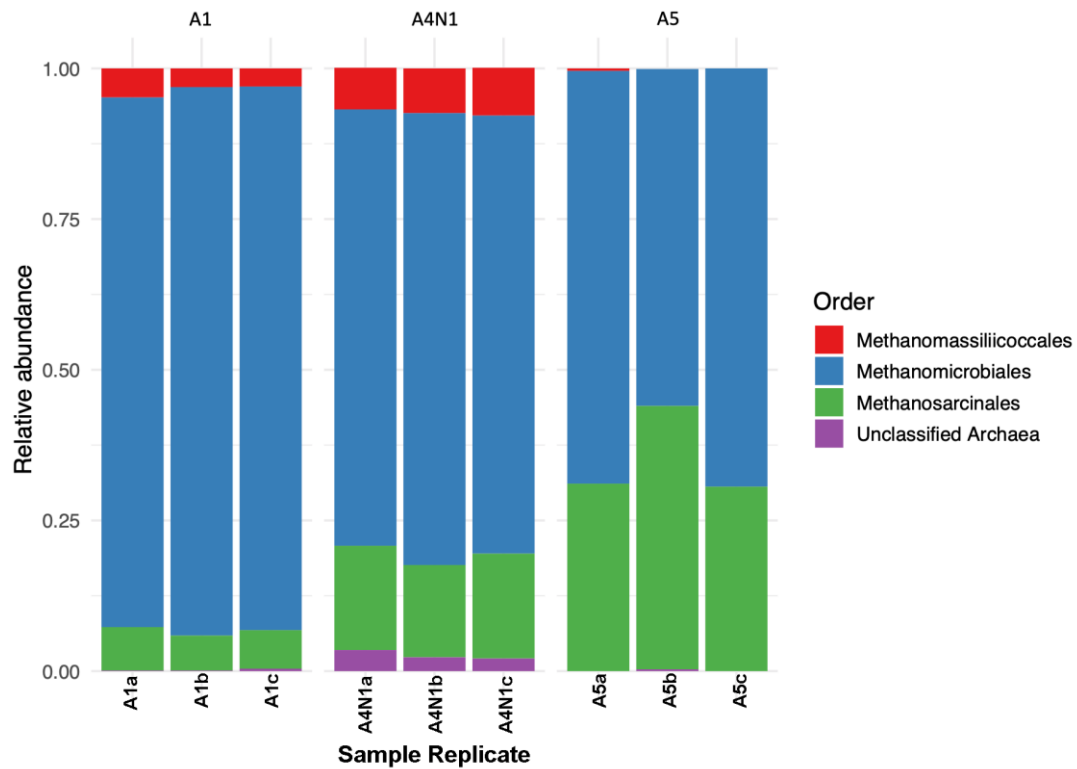

**Figure S3.** Taxonomic profile of *mcrA* amplicon reads rarefied to the smallest sample (8,299 sequences). Only groups containing > 10 reads are shown. Taxonomic labels were retrieved from the BLASTX best-hit versus Luke McKay's *mcrA* database (see methods for details).
